# Supplementary material
Source: ML conference proceedings conference paper supplement (https://aclanthology.org/2025.woah-1.23)

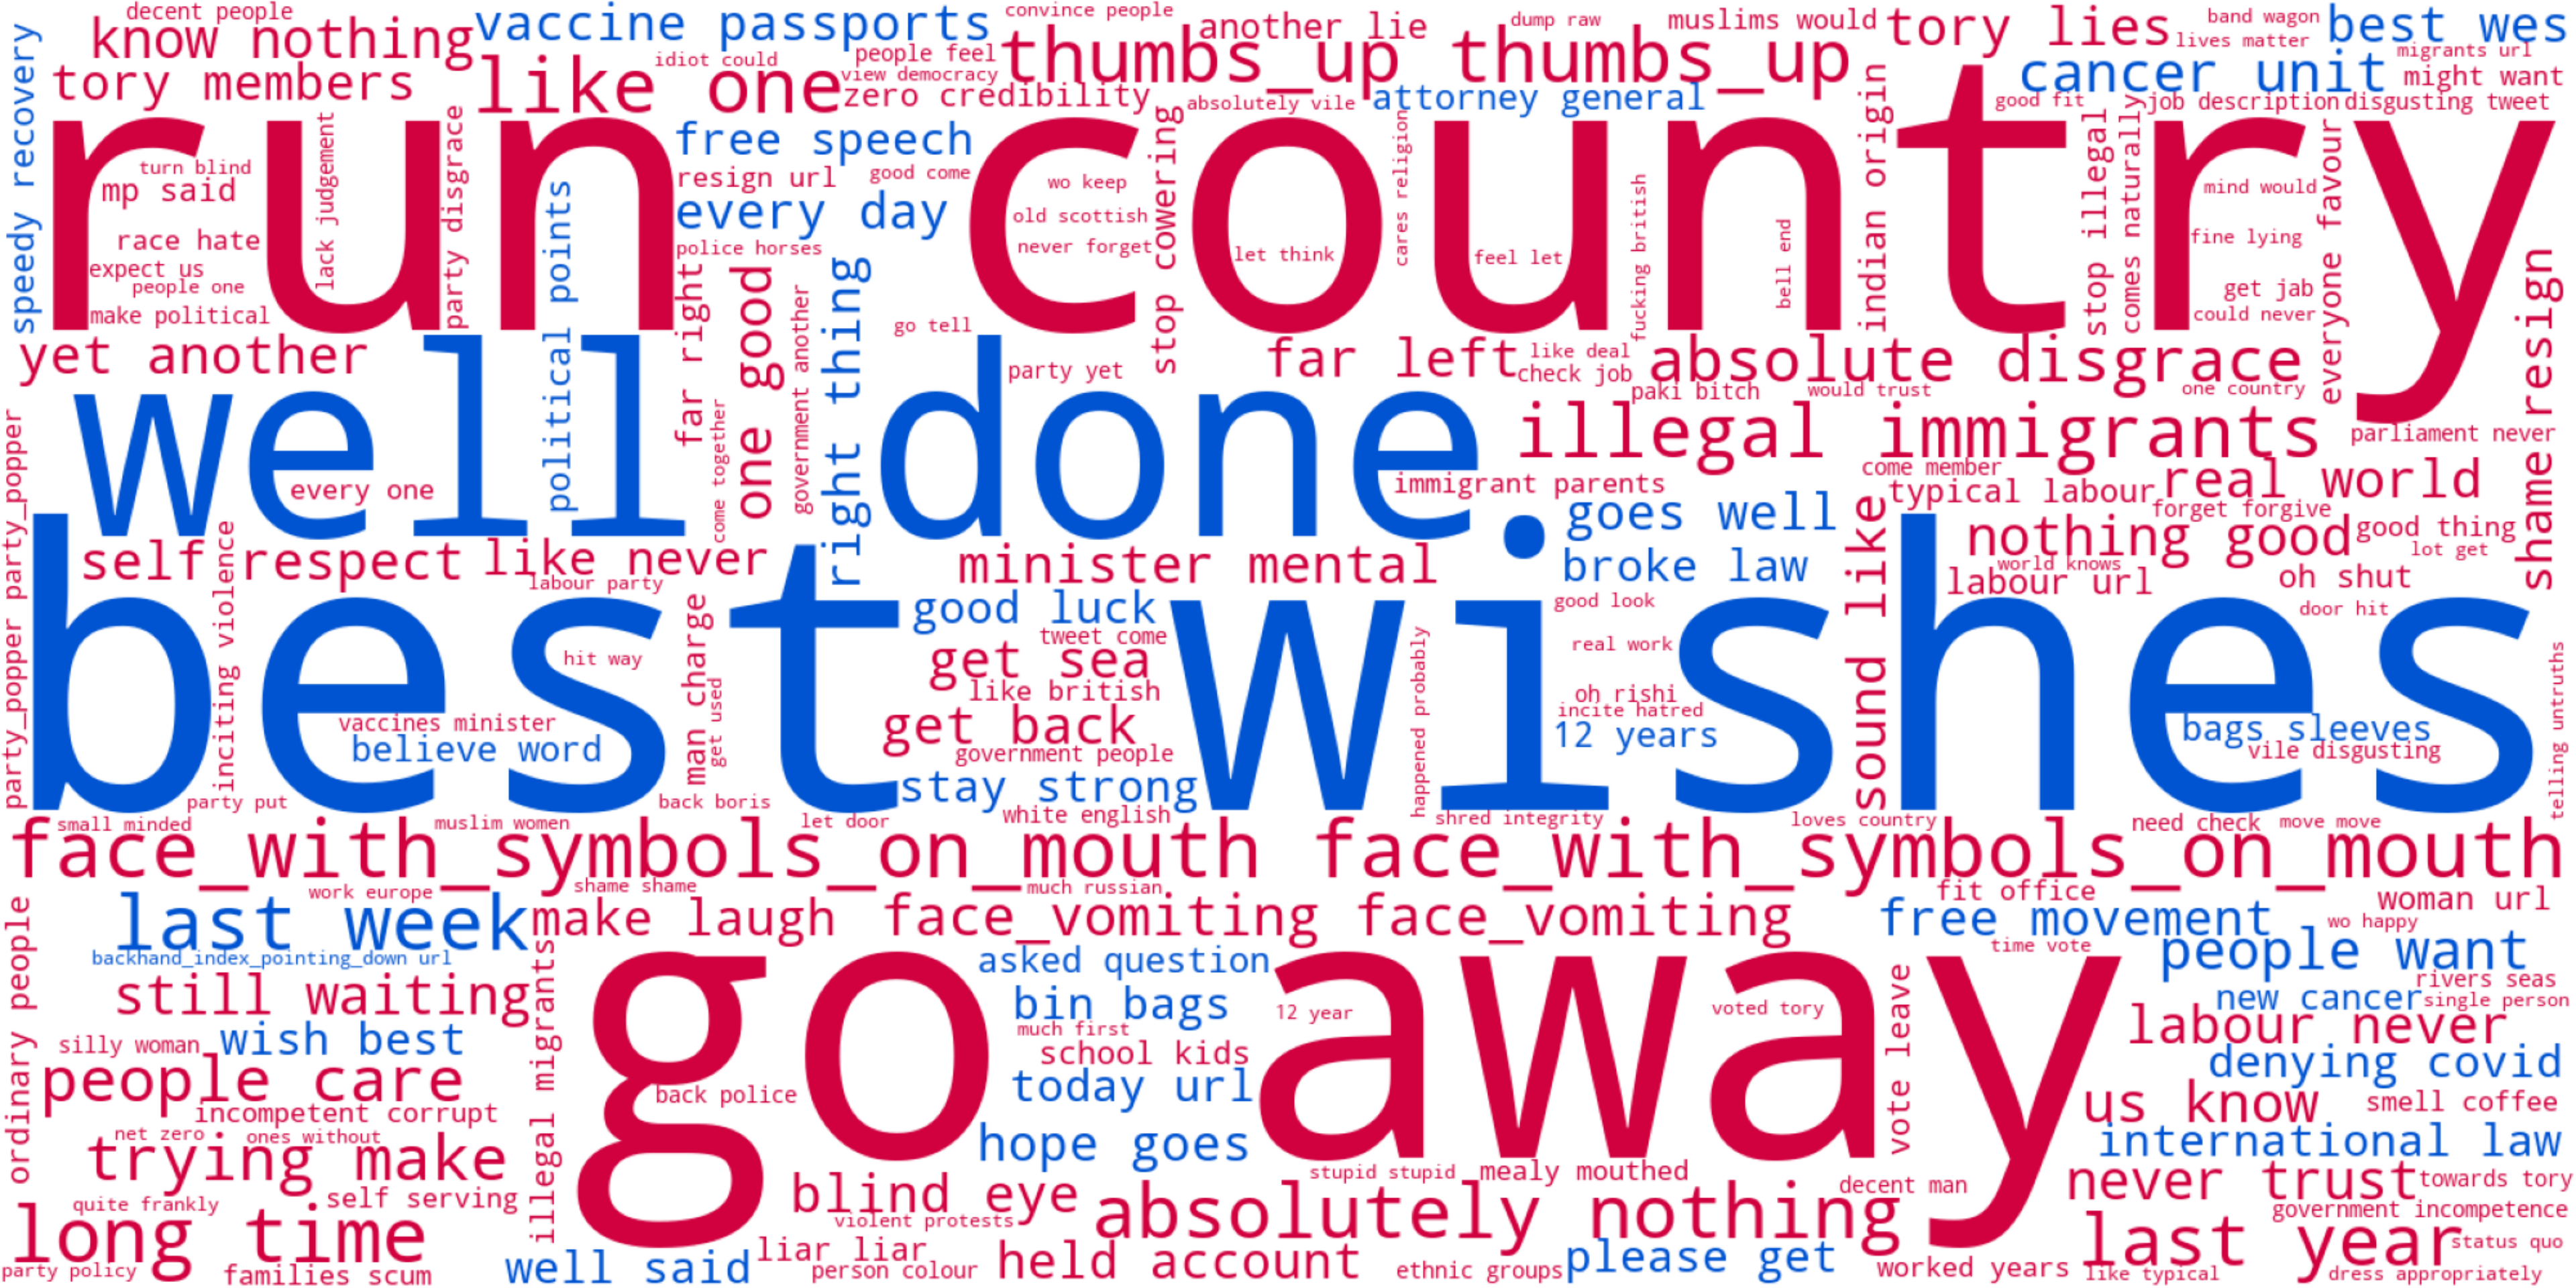

Supplement: SupplementaryMaterial [file bow_bi.pdf › figures/bow_bi.pdf]

hostile

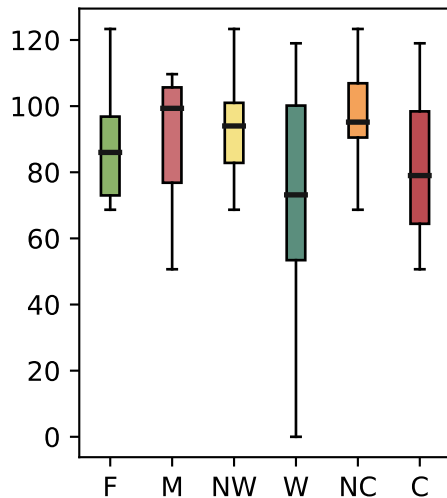

race

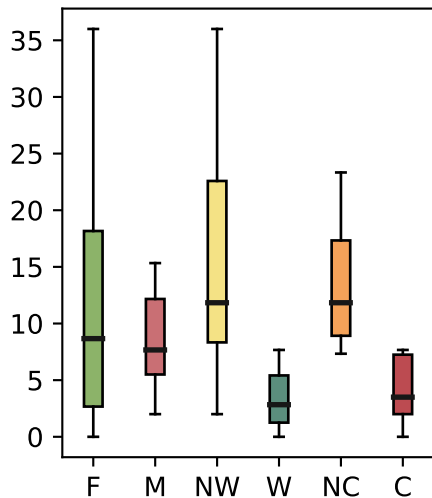

gender

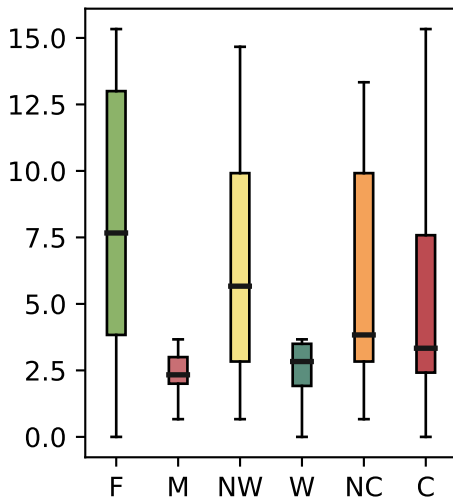

religion

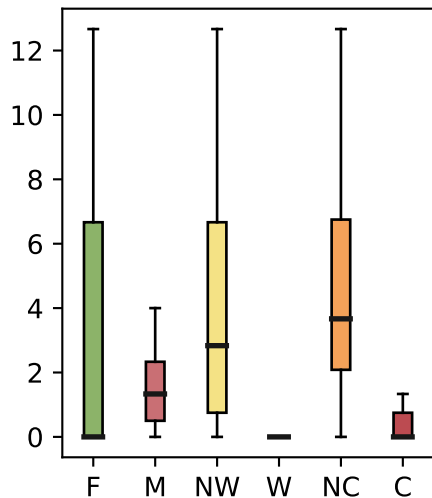

Supplement: SupplementaryMaterial [file stats.pdf › figures/stats.pdf]

hostile

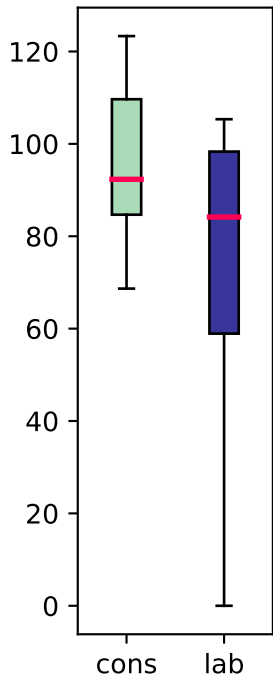

race

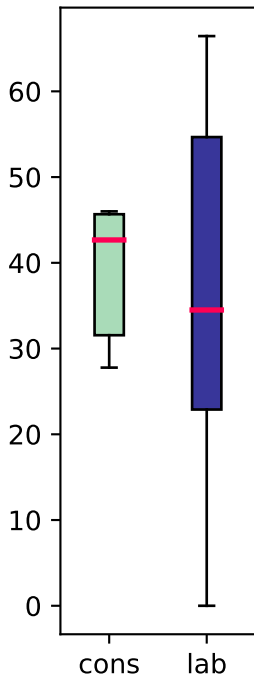

gender

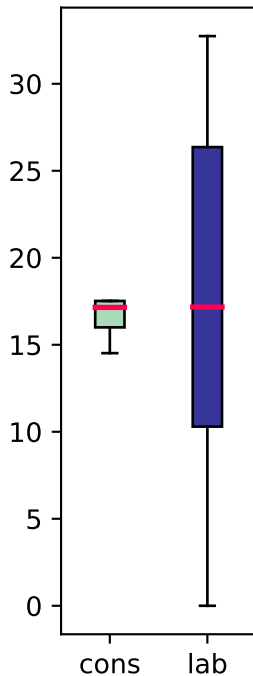

religion

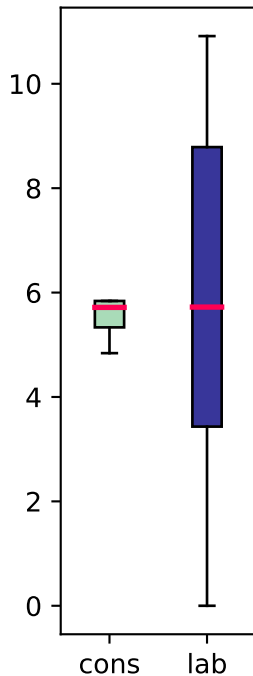

Supplement: SupplementaryMaterial [file stats_party.pdf › figures/stats_party.pdf]

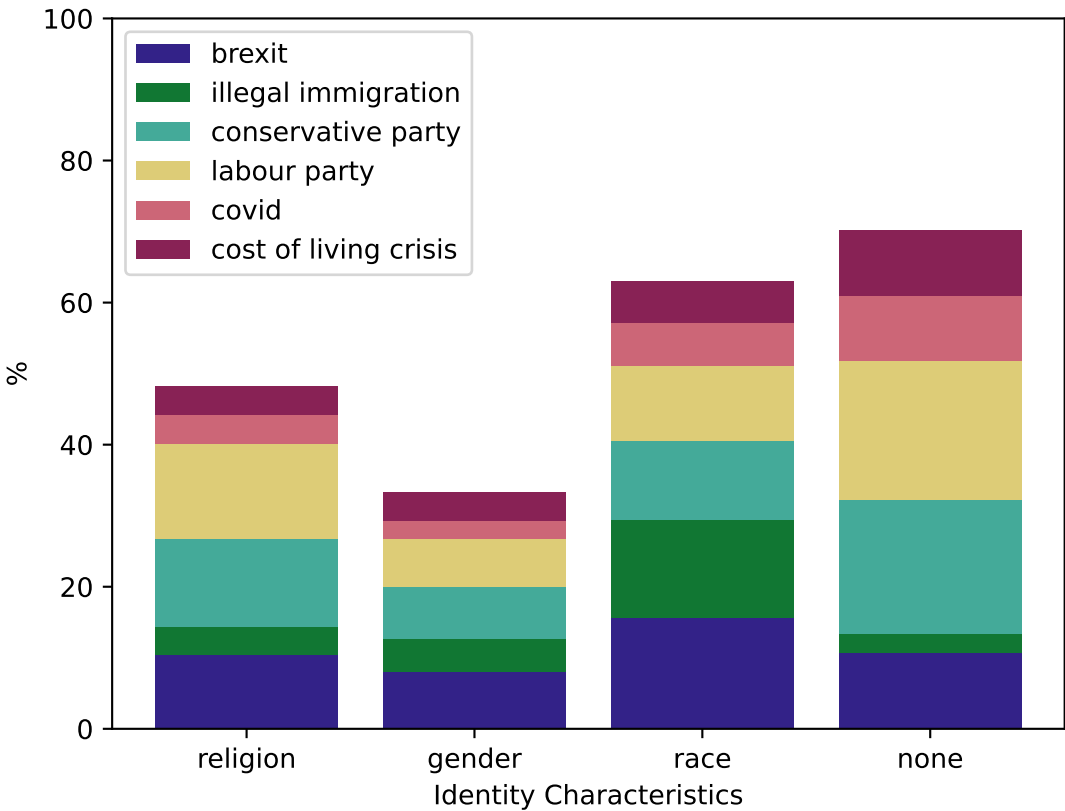

Supplement: SupplementaryMaterial [file topic_id.pdf › figures/topic_id.pdf]

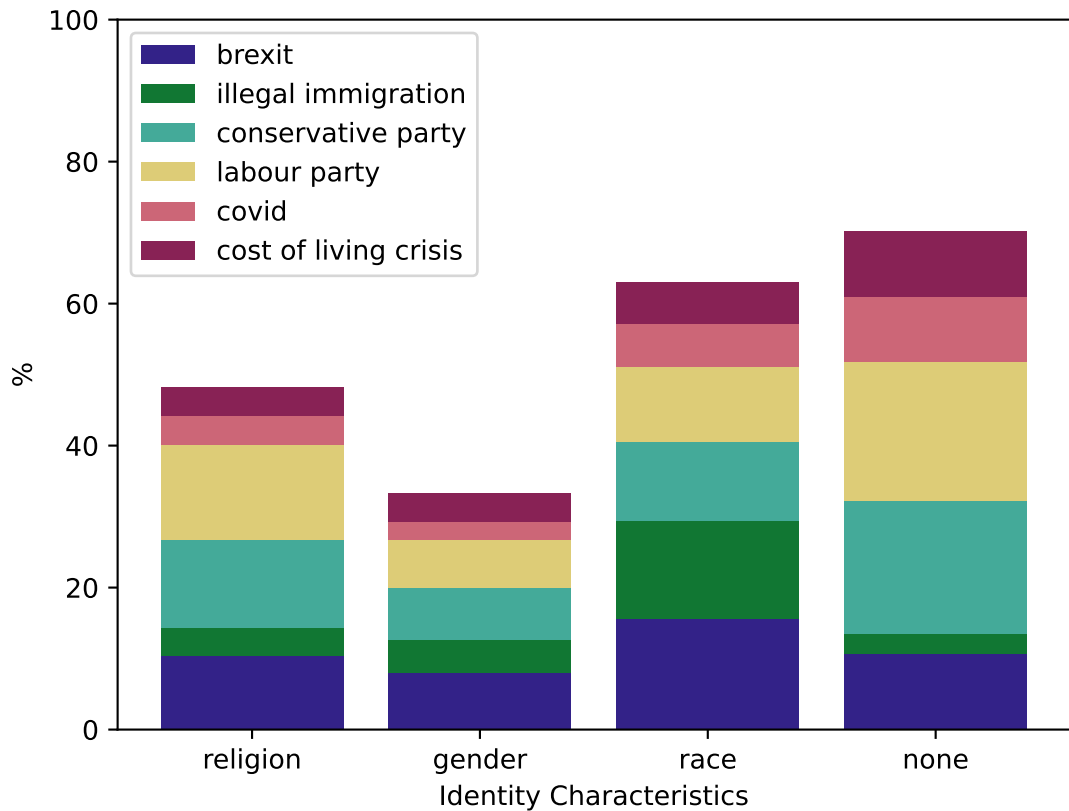

Supplement: SupplementaryMaterial [file topid_id_old.pdf › figures/topid_id_old.pdf]
